# Supplementary material for: Pain Tolerance in Persons With Recognized and Unrecognized Myocardial Infarction: A Population‐Based, Cross‐Sectional Study
Source: PubMed Central journal article supplement — J Am Heart Assoc. 2016 Dec 21;5(12):e003846. doi: 10.1161/JAHA.116.003846 (PMC5210406; doi:10.1161/jaha.116.003846), 2016-12-21
Supplement: JAH3-5-e003846-s001.pdf [file JAH3-5-e003846-s001.pdf]

# **SUPPLEMENTAL MATERIAL**

**Table S1. Hazard ratios (HRs) for cold pressor tolerance (aborted cold pressor test) with no prior myocardial infarction (MI) as reference, by MI status and sex. The Tromsø Study 2007-08.**

|                               | Adjusted for age and sex* |           | Multivariable adjusted** |           |
|-------------------------------|---------------------------|-----------|--------------------------|-----------|
|                               | HR                        | 95% CI    | HR                       | 95% CI    |
| <b>Women and Men</b>          |                           |           |                          |           |
| No prior MI (n=4,235)         | 1.00                      | -         | 1.00                     | -         |
| Prior unrecognized MI(n=387)  | 0.84                      | 0.68-1.03 | 0.79                     | 0.63-0.99 |
| Prior recognized MI (n=227)   | 1.30                      | 1.02-1.65 | 1.08                     | 0.82-1.43 |
| <b>Women only</b>             |                           |           |                          |           |
| No prior MI (n=2,482)         | 1.00                      | -         | 1.00                     | -         |
| Prior unrecognized MI(n= 145) | 0.84                      | 0.62-1.12 | 0.78                     | 0.56-1.09 |
| Prior recognized MI (n=49)    | 1.75                      | 1.21-2.52 | 1.30                     | 0.81-2.06 |
| <b>Men only</b>               |                           |           |                          |           |
| No prior MI (n=1,753)         | 1.00                      | -         | 1.00                     | -         |
| Prior unrecognized MI (n=242) | 0.83                      | 0.61-1.11 | 0.79                     | 0.57-1.10 |
| Prior recognized MI (n=178)   | 1.07                      | 0.78-1.47 | 1.02                     | 0.72-1.44 |

\*The analyses of both women and men were adjusted for sex

\*\*Adjusted for sex, age, mean systolic blood pressure, use of blood pressure lowering drugs, diabetes, daily smoking, psychological distress and physical activity.

**Table S2. Characteristics of participants included and excluded from analyses, The Tromsø Study 2007-08.**

|                                                                            | Included<br>(n= 4,849) | Excluded<br>(n=2,457) |
|----------------------------------------------------------------------------|------------------------|-----------------------|
| <b>Age in years</b>                                                        | 62 ±9                  | 66 ±10                |
| Women                                                                      | 2,173(45%)             | 1,489 (60%)           |
| Blood pressure                                                             |                        |                       |
| Current use of blood-pressure medication                                   | 1284 (27%)             | 792 (32%)             |
| Systolic blood pressure in mmHg                                            | 140 ±23                | 143±24                |
| Hypertension                                                               | 2,803 (58 %)           | 1,579 (64%)           |
| Smoking habits                                                             |                        |                       |
| Current daily smoker                                                       | 899 (19%)              | 439 (18%)             |
| Former daily smoker                                                        | 2,272 (47%)            | 1,099 (46%)           |
| Never daily smoker                                                         | 1,621 (34%)            | 866 (36%)             |
| Diabetes*                                                                  | 342(7%)                | 192 (8%)              |
| Physical activity                                                          |                        |                       |
| Sedentary lifestyle (Reading, watching TV)                                 | 811 (18%)              | 468(22%)              |
| Walking, cycling, or other forms of exercise > 4<br>hours a week           | 2885 (65%)             | 1333 (63%)            |
| Participation in recreational sports, heavy<br>gardening, etc. >4 h a week | 720 (16%)              | 339 (16%)             |

Psychological distress (HSCL-10 score >1.85)

540 (11%)

343 (14%)
